# Supplementary material for: Heat-Related Deaths in Hot Cities: Estimates of Human Tolerance to High Temperature Thresholds
Source: Int J Environ Res Public Health. 2014 Mar 20;11(3):3304–26. doi: 10.3390/ijerph110303304 (PMC3987036; doi:10.3390/ijerph110303304)

## **Heat-Related Deaths in Hot Cities: Estimates of Human Tolerance to High Temperature Thresholds**

---

### **Selection of ICD-10 Codes Indicating Conditions and Diseases that Might Be Directly or Indirectly Related to Heat**

Diana B. Petitti, M.D., M.P.H.

We selected ICD-10 codes indicating conditions that might be directly or indirectly related to exposure to high environmental temperature based on: (1) knowledge of the direct physiologic effects of exposure to high environmental temperature and the downstream consequences of these physiologic effects on the body; and (2) the results of extensive prior work of others on temperature-mortality relationships.

Eight categories of conditions and diseases used in our analysis are described in more detail below. The first three categories were conditions directly due to exposure to high environmental heat; dehydration (and direct consequence of exposure to high environmental heat); and conditions that are possible consequences of heat exposure and/or dehydration. The last five categories, cardiac disease/stroke, chronic renal failure, heart failure, COPD/asthma, and other respiratory illnesses have been prominent in prior analyses of the association of high environmental heat with death and hospitalization.

Supplemental Table S1 provides a complete list of codes for causes of death in each category and the terms associated with exposure to high environmental heat that are entered as free text in any of the underlying cause of death fields in the first three categories.

#### **Direct Exposure to Environmental Heat**

In the human, exposure to high environmental heat is often accompanied by exposure to the sun. Thus, the first set of ICD-10 codes are for conditions that include the terms “sunburn”, “sun exposure”, and/or “ultraviolet light”. These were located by doing a text search of the online version of the ICD-10. The second set of ICD-10 codes identified as being due to the direct effect of heat are those that include the term “heat.” These were also located by doing a text search of the online version of the ICD-10.

#### **Dehydration**

In the human, exposure to high environmental heat is accompanied by sweating and fluid loss. The consequence of fluid loss is dehydration, which is followed by volume depletion and hypovolemia. ICD-10 codes that included the term “dehydration” were identified by doing a text search of the online version of the ICD-10.

## Possible Consequences of Heat and Dehydration

In the human, exposure to high environmental heat is accompanied by sweating and fluid loss. The consequence of fluid loss is dehydration, which is followed by volume depletion and hypovolemia. Supplemental Figure S1 is a graphical depiction of the model that explains our approach to selecting codes considered likely to be due to the physiologic and pathophysiologic consequences of heat and dehydration/volume depletion/hypovolemia.

Volume depletion and hypovolemia can cause hypotension. Hypotension can lead to shock, coma and sudden death. Dehydration/volume depletion/hypovolemia can lead to the formation of kidney stones and thus to renal colic.

Hypovolemia can lead to hemoconcentration and cause disturbances in serum electrolytes (sodium—hypernatremia—and potassium—hyperkalemia) and osmolality (hyperosmolality). The disturbances of serum electrolytes can lead to arrhythmias, coma, and sudden death.

Hypovolemia can lead to acute renal failure.

Thirst is a physiologic response to dehydration. When water is consumed in response to thirst without adequate electrolytes, the consequence can be disturbances in serum electrolytes (sodium—hyponatremia—and potassium—hypokalemia) and osmolality (hypo-osmolality).

Disturbances in serum electrolytes can lead to arrhythmias, coma, and sudden death.

One consequence of heat and dehydration is hyperthermia, which can directly cause arrhythmias, and can lead to shock, coma, and sudden death. Hyperthermia also can lead to fever and then febrile convulsions. Hyperthermia may cause disseminated intravascular coagulation (DIC).

A number of the consequences of heat and dehydration (e.g., hypotension) can cause malaise and fatigue.

Malaise and fatigue are also symptoms of hyperthermia and also of hypovolemia. “Dizziness and giddiness” is a condition with a specific ICD-10 code that has been identified in other studies as having a relationship to ED visits and hospitalization during heat waves.

We selected the ICD-10 codes that corresponded to the other named conditions that are a consequence of heat and dehydration by reading the ICD-10 code book and using information in the publications of others.

## Cardiac Disease/Stroke

Studies of excess mortality and morbidity in heat waves consistently find an association with atherosclerotic heart disease and stroke. The description of the physiologic and pathophysiologic consequences of heat and dehydration provide ample explanation for an effect of heat on mortality and morbidity due to atherosclerotic heart disease and stroke. Hypotension, hemoconcentration, and electrolyte disorders would all be expected to exacerbate the severity of underlying vascular disease and/or lead to coronary or cerebral thrombosis.

We selected the set of ICD-10 codes for atherosclerotic vascular disease that have been used by other researchers noting that the link between hemorrhagic stroke (including subarachnoid hemorrhage) and heat/dehydration and its consequences seems tenuous.

## **Chronic Renal Failure**

Chronic renal failure is associated with a multiplicity of underlying abnormalities of fluid and electrolyte metabolism. Many people with chronic renal failure are being dialyzed. An effect of heat and dehydration and their consequences in exacerbating the severity of chronic renal failure and even perhaps causing death in a person with chronic renal failure has high biologic plausibility. We selected all of the ICD-10 codes for chronic renal failure.

## **Heart Failure**

Heart failure is associated with a multiplicity of underlying abnormalities in handling fluids. People with heart failure are at increased risk of atrial fibrillation and are vulnerable to other cardiac arrhythmias. They are also at increased risk of stroke. An effect of heat and dehydration and their consequences in exacerbating the severity of heart failure or causing death in a person with heart failure has high biologic plausibility.

We selected the ICD-10 codes for heart failure for this category. We also selected the ICD-10 codes for unspecified cardiovascular disease, other and ill-defined heart disease and unspecified heart disease for this category based on the belief that many people who have these non-specific codes listed as a cause of death would have heart failure.

## **Chronic Obstructive Pulmonary Disease (COPD)/Asthma**

### **Other Respiratory Diseases**

Some prior research on deaths and hospitalizations in the context of extreme heat has found strong associations with respiratory illnesses. Following Semenza *et al.* [1] and Schwartz [2], we examined chronic obstructive pulmonary disease (COPD) and asthma separately from infections, influenza, and other respiratory diseases.

## **References**

1. Semenza, J.C.; McCullough, J.E.; Flanders, W.D.; McGeehin, M.A.; Lumpkin, J.R. Excess hospital admissions during the July 1995 heat wave in Chicago. *Am. J. Prev. Med.* **1999**, *16*, 269–277.
2. Schwartz, J. Who is sensitive to extremes of temperature? A case-only analysis. *Epidemiology* **2005**, *16*, 67–72.

**Table S1.** ICD-10 codes for conditions and diseases directly and indirectly related to high environmental heat.

| <b>Direct Exposure to Environmental Heat</b> |                                                                 |
|----------------------------------------------|-----------------------------------------------------------------|
| ICD-10 <sup>a</sup>                          | Condition                                                       |
| L55                                          | Sunburn                                                         |
| L55.0                                        | Sunburn of first degree                                         |
| L55.1                                        | Sunburn of second degree                                        |
| L55.2                                        | Sunburn of third degree                                         |
| L55.8                                        | Other sunburn                                                   |
| L55.9                                        | Sunburn, unspecified                                            |
| L56                                          | Other acute skin changes due to ultraviolet radiation           |
| L56.0                                        | Drug phototoxic response                                        |
| L56.1                                        | Drug photoallergic response                                     |
| L56.3                                        | Solar urticaria                                                 |
| L56.4                                        | Polymorphous light eruption                                     |
| L56.8                                        | Other specified acute skin changes due to ultraviolet radiation |
| L56.9                                        | Acute skin change due to ultraviolet radiation, unspecified     |
| T67                                          | Effects of heat and light                                       |
| T67.0                                        | Heatstroke and sunstroke                                        |
| T67.1                                        | Heat syncope                                                    |
| T67.2                                        | Heat cramp                                                      |
| T67.3                                        | Heat exhaustion, anhydrotic                                     |
| T67.4                                        | Heat exhaustion due to salt depletion                           |
| T67.5                                        | Heat exhaustion, unspecified                                    |
| T67.6                                        | Heat fatigue, transient                                         |
| T67.7                                        | Heat oedema                                                     |
| T67.8                                        | Other effects of heat and light                                 |
| T67.9                                        | Effect of heat and light, unspecified                           |
| X30                                          | Exposure to excessive natural heat                              |
| X32                                          | Exposure to sunlight                                            |

Keywords: <sup>b</sup> Environmental Heat, Excessive Heat, Excessive Natural Heat, Exposure to Heat, Exposure to Heated Environment, Exposure to High Environmental Temperature, Exposure to Hot Desert Environment, Exposure to Hot Environment, Heat Cramps, Heat Effect, Heat Environment, Heat Exhaustion, Heated Environment, Heat Exposure, Heat Related, Heat Stress, Heatstroke, Heat Syncope, High Environmental Temperature, Hiking in Hot Climate, Hot Outside, Sunburn, Sun Exposure, Temperature.

| Dehydration         |                        |
|---------------------|------------------------|
| ICD-10 <sup>a</sup> | Condition              |
| E86                 | Volume depletion       |
| P74.1               | Dehydration of newborn |
| R68.2               | Dry mouth, unspecified |
| X54                 | Lack of water          |

Keyword: <sup>b</sup> Dehydration.

#### Possible Consequences of Heat or Dehydration

| ICD-10 <sup>a</sup> | Condition                                                       |
|---------------------|-----------------------------------------------------------------|
| D65                 | Disseminated intravascular coagulation [defibrination syndrome] |
| E87.0               | Hyperosmolality and hypernatremia                               |
| E87.1               | Hypo-osmolality and hyponatremia                                |
| E87.4               | Mixed disorder of acid-base balance                             |
| E87.5               | Hyperkalemia                                                    |
| E87.6               | Hypokalemia                                                     |
| I46                 | Cardiac arrest                                                  |
| I46.0               | Cardiac arrest with successful resuscitation                    |
| I46.1               | Sudden cardiac death, so described                              |
| I46.9               | Cardiac arrest, unspecified                                     |
| I47                 | Paroxysmal tachycardia                                          |
| I47.0               | Reentry ventricular arrhythmia                                  |
| I47.1               | Supraventricular tachycardia                                    |
| I47.2               | Ventricular tachycardia                                         |
| I47.9               | Paroxysmal tachycardia, unspecified                             |
| I48                 | Atrial fibrillation and flutter                                 |
| I49                 | Other cardiac arrhythmias                                       |
| I49.0               | Ventricular fibrillation and flutter                            |
| I49.1               | Atrial premature depolarization                                 |
| I49.2               | Junctional premature depolarization                             |
| I49.3               | Ventricular premature depolarization                            |
| I49.4               | Other and unspecified premature depolarization                  |
| I49.5               | Sick sinus syndrome                                             |
| I49.8               | Other specified cardiac arrhythmias                             |
| I95.0               | Idiopathic hypotension                                          |
| I95.1               | Orthostatic hypotension                                         |
| I95.8               | Other hypotension                                               |
| I95.9               | Hypotension, unspecified                                        |
| N17                 | Acute renal failure                                             |
| N17.0               | Acute renal failure with tubular necrosis                       |
| N17.1               | Acute renal failure with acute cortical necrosis                |
| N17.2               | Acute renal failure with medullary necrosis                     |
| N17.8               | Other acute renal failure                                       |
| N17.9               | Acute renal failure, unspecified                                |
| N20                 | Calculus of kidney and ureter                                   |
| N20.0               | Calculus of kidney                                              |
| N20.1               | Calculus of ureter                                              |

|       |                                                                                    |
|-------|------------------------------------------------------------------------------------|
| N20.2 | Calculus of kidney with calculus of ureter                                         |
| N20.9 | Urinary calculus, unspecified                                                      |
| N21   | Calculus of lower urinary tract                                                    |
| N21.0 | Calculus in bladder                                                                |
| N21.1 | Calculus in urethra                                                                |
| N21.8 | Other lower urinary tract calculus                                                 |
| N21.9 | Calculus of lower urinary tract, unspecified                                       |
| N23   | Unspecified renal colic                                                            |
| P74.2 | Disturbances of sodium balance of newborn                                          |
| P74.3 | Disturbances of potassium balance of newborn                                       |
| P81.0 | Environmental hyperthermia of newborn                                              |
| R00   | Abnormalities of heart beat                                                        |
| R00.0 | Tachycardia,unspecified                                                            |
| R00.1 | Bradycardia,unspecified                                                            |
| R00.2 | Palpitations                                                                       |
| R00.8 | Other and unspecified abnormalities of heart beat                                  |
| R40.2 | Coma, unspecified                                                                  |
| R42   | Dizziness and giddiness                                                            |
| R50.9 | Fever, unspecified                                                                 |
| R53   | Malaise and fatigue                                                                |
| R55   | Syncope and collapse                                                               |
| R56.0 | Febrile convulsions                                                                |
| R57.1 | Hypovolemic shock                                                                  |
| R57.8 | Other shock                                                                        |
| R57.9 | Shock, unspecified                                                                 |
| R96   | Other sudden death, cause unknown                                                  |
| R96.0 | Instantaneous death                                                                |
| R96.1 | Death occurring less than 24 hours from onset of symptoms, not otherwise explained |
| R98   | Unattended death                                                                   |

Keywords: <sup>b</sup> Exhaustion, Hyperkalemia, Hyponatremia, Hyperther, Hyperthermia, Hypokalemia, Hyponatremia, Hypovolemia.

#### Cardiac Disease/Stroke

| ICD-10 <sup>a</sup> | Condition                                                  |
|---------------------|------------------------------------------------------------|
| I20                 | Angina pectoris                                            |
| I20.0               | Unstable angina                                            |
| I20.1               | Angina pectoris with documented spasm                      |
| I20.8               | Other forms of angina pectoris                             |
| I20.9               | Angina pectoris, unspecified                               |
| I21                 | Acute myocardial infarction                                |
| I21.0               | Acute transmural myocardial infarction of anterior wall    |
| I21.1               | Acute transmural myocardial infarction of inferior wall    |
| I21.2               | Acute transmural myocardial infarction of other sites      |
| I21.3               | Acute transmural myocardial infarction of unspecified site |
| I21.4               | Acute subendocardial myocardial infarction                 |
| I21.9               | Acute myocardial infarction, unspecified                   |
| I22                 | Subsequent myocardial infarction                           |
| I22.0               | Subsequent myocardial infarction of anterior wall          |

|       |                                                                                      |
|-------|--------------------------------------------------------------------------------------|
| I22.1 | Subsequent myocardial infarction of inferior wall                                    |
| I22.8 | Subsequent myocardial infarction of other sites                                      |
| I22.9 | Subsequent myocardial infarction of unspecified site                                 |
| I24   | Other acute ischemic heart diseases                                                  |
| I24.1 | Dressler's syndrome                                                                  |
| I24.8 | Other forms of acute ischemic heart disease                                          |
| I24.9 | Acute ischemic heart disease, unspecified                                            |
| I25   | Chronic ischemic heart disease                                                       |
| I25.0 | Atherosclerotic cardiovascular disease, so described                                 |
| I25.1 | Atherosclerotic heart disease                                                        |
| I25.2 | Old myocardial infarction                                                            |
| I25.3 | Aneurysm of heart                                                                    |
| I25.4 | Coronary artery aneurysm                                                             |
| I25.5 | Ischemic cardiomyopathy                                                              |
| I25.6 | Silent myocardial ischemia                                                           |
| I25.8 | Other forms of chronic ischemic heart disease                                        |
| I25.9 | Chronic ischemic heart disease, unspecified                                          |
| I49.9 | Cardiac arrhythmia, unspecified                                                      |
| I60   | Subarachnoid hemorrhage                                                              |
| I60.0 | Subarachnoid hemorrhage from carotid siphon and bifurcation                          |
| I60.1 | Subarachnoid hemorrhage from middle cerebral artery                                  |
| I60.2 | Subarachnoid hemorrhage from anterior communicating artery                           |
| I60.3 | Subarachnoid hemorrhage from posterior communicating artery                          |
| I60.4 | Subarachnoid hemorrhage from basilar artery                                          |
| I60.5 | Subarachnoid hemorrhage from vertebral artery                                        |
| I60.6 | Subarachnoid hemorrhage from other intracranial arteries                             |
| I60.7 | Subarachnoid hemorrhage from intracranial artery, unspecified                        |
| I60.8 | Other subarachnoid hemorrhage                                                        |
| I60.9 | Subarachnoid hemorrhage, unspecified                                                 |
| I61   | Intracerebral hemorrhage                                                             |
| I61.0 | Intracerebral hemorrhage in hemisphere, subcortical                                  |
| I61.1 | Intracerebral hemorrhage in hemisphere, cortical                                     |
| I61.2 | Intracerebral hemorrhage in hemisphere, unspecified                                  |
| I61.3 | Intracerebral hemorrhage in brain stem                                               |
| I61.4 | Intracerebral hemorrhage in cerebellum                                               |
| I61.5 | Intracerebral hemorrhage, intraventricular                                           |
| I61.6 | Intracerebral hemorrhage, multiple localized                                         |
| I61.8 | Other intracerebral hemorrhage                                                       |
| I61.9 | Intracerebral hemorrhage, unspecified                                                |
| I62   | Other nontraumatic intracranial hemorrhage                                           |
| I62.0 | Subdural hemorrhage (acute) (nontraumatic)                                           |
| I62.1 | Nontraumatic extradural hemorrhage                                                   |
| I62.9 | Intracranial hemorrhage (nontraumatic), unspecified                                  |
| I63   | Cerebral infarction                                                                  |
| I63.0 | Cerebral infarction due to thrombosis of precerebral arteries                        |
| I63.1 | Cerebral infarction due to embolism of precerebral arteries                          |
| I63.2 | Cerebral infarction due to unspecified occlusion or stenosis of precerebral arteries |
| I63.3 | Cerebral infarction due to thrombosis of cerebral arteries                           |
| I63.4 | Cerebral infarction due to embolism of cerebral arteries                             |

|       |                                                                                   |
|-------|-----------------------------------------------------------------------------------|
| I63.5 | Cerebral infarction due to unspecified occlusion or stenosis of cerebral arteries |
| I63.6 | Cerebral infarction due to cerebral venous thrombosis, nonpyogenic                |
| I63.8 | Other cerebral infarction                                                         |
| I63.9 | Cerebral infarction, unspecified                                                  |
| I64   | Stroke, not specified as hemorrhage or infarction                                 |
| I67   | Other cerebrovascular diseases                                                    |
| I67.0 | Dissection of cerebral arteries, nonruptured                                      |
| I67.1 | Cerebral aneurysm, nonruptured                                                    |
| I67.2 | Cerebral atherosclerosis                                                          |
| I67.3 | Progressive vascular leukoencephalopathy                                          |
| I67.4 | Hypertensive encephalopathy                                                       |
| I67.5 | Moyamoya disease                                                                  |
| I67.6 | Nonpyogenic thrombosis of intracranial venous system                              |
| I67.7 | Cerebral arteritis, not elsewhere classified                                      |
| I67.8 | Other specified cerebrovascular diseases                                          |
| I67.9 | Cerebrovascular disease, unspecified                                              |
| I69   | Sequelae of cerebrovascular disease                                               |
| I69.0 | Sequelae of subarachnoid hemorrhage                                               |
| I69.1 | Sequelae of intracerebral hemorrhage                                              |
| I69.2 | Sequelae of other nontraumatic intracranial hemorrhage                            |
| I69.3 | Sequelae of cerebral infarction                                                   |
| I69.4 | Sequelae of stroke, not specified as hemorrhage or infarction                     |
| I69.8 | Sequelae of other and unspecified cerebrovascular diseases                        |
| I70   | Atherosclerosis                                                                   |
| I70.0 | Atherosclerosis of aorta                                                          |
| I70.1 | Atherosclerosis of renal artery                                                   |
| I70.2 | Atherosclerosis of arteries of the extremities                                    |
| I70.8 | Atherosclerosis of other arteries                                                 |
| I70.9 | Generalized and unspecified atherosclerosis                                       |

#### Chronic Renal Failure

| ICD-10 <sup>a</sup> | Condition                          |
|---------------------|------------------------------------|
| N18                 | Chronic renal failure              |
| N18.0               | End-stage renal disease            |
| N18.8               | Other chronic renal failure        |
| N18.9               | Chronic renal failure, unspecified |
| N19                 | Unspecified renal failure          |

#### Heart Failure

| ICD-10 <sup>a</sup> | Condition                           |
|---------------------|-------------------------------------|
| I50                 | Heart failure                       |
| I50.0               | Congestive heart failure            |
| I50.1               | Left ventricular failure            |
| I50.9               | Heart failure, unspecified          |
| I51.6               | Cardiovascular disease, unspecified |
| I51.8               | Other ill-defined heart diseases    |
| I51.9               | Heart disease, unspecified          |

**Chronic Obstructive Pulmonary Diseases (COPD)/Asthma**

| ICD-10 <sup>a</sup> | Condition                                   |
|---------------------|---------------------------------------------|
| J43                 | Emphysema                                   |
| J43.0               | MacLeod syndrome                            |
| J43.1               | Panlobular emphysema                        |
| J43.2               | Centrilobular emphysema                     |
| J43.8               | Other emphysema                             |
| J43.9               | Emphysema, unspecified                      |
| J44                 | Other COPD                                  |
| J44.0               | COPD with acute lower respiratory infection |
| J44.1               | COPD with acute exacerbation, unspecified   |
| J44.8               | Other specified COPD                        |
| J44.9               | COPD, unspecified                           |
| J45                 | Asthma                                      |
| J45.0               | Predominantly allergic asthma               |
| J45.1               | Nonallergic asthma                          |
| J45.8               | Mixed asthma                                |
| J45.9               | Asthma, unspecified                         |
| J46                 | Status asthmaticus                          |

**Other Respiratory Diseases**

| ICD-10 <sup>a</sup> | Condition                                                         |
|---------------------|-------------------------------------------------------------------|
| J00-J06             | Acute upper respiratory infections                                |
| J09-J18             | Influenza and pneumonia                                           |
| J20-22              | Other acute lower respiratory infections                          |
| J30-39              | Other diseases of the upper respiratory tract                     |
| J40-J42             | Bronchitis                                                        |
| J47                 | Bronchiectasis                                                    |
| J60-J70             | Lung diseases due to external agents                              |
| J80-J84             | Other respiratory diseases principally affecting the interstitium |
| J85-J86             | Suppurative and necrotic conditions of lower respiratory tract    |
| J90-J94             | Other diseases of pleura                                          |
| J95-J99             | Other diseases of the respiratory system                          |

<sup>a</sup> International Classification of Diseases, 10th Revision. <sup>b</sup> We searched the database for selected keyword terms entered as free text in any of the four underlying cause-of-death fields in Part I of the death certificate. Cases with keywords were included in one of the first three categories of death (*i.e.*, direct exposure to environmental heat, dehydration, or possible consequences of heat and dehydration). Cases with keywords associated with more than one of these categories were assigned to the category most directly associated with heat; *i.e.*, a case with a keyword from direct exposure to environmental heat and a keyword from possible consequences of heat and dehydration, was assigned to the first category.

**Figure S1.** Approach to selection of ICD-10 codes for conditions that are likely due to physiologic and pathophysiologic consequences of heat and dehydration.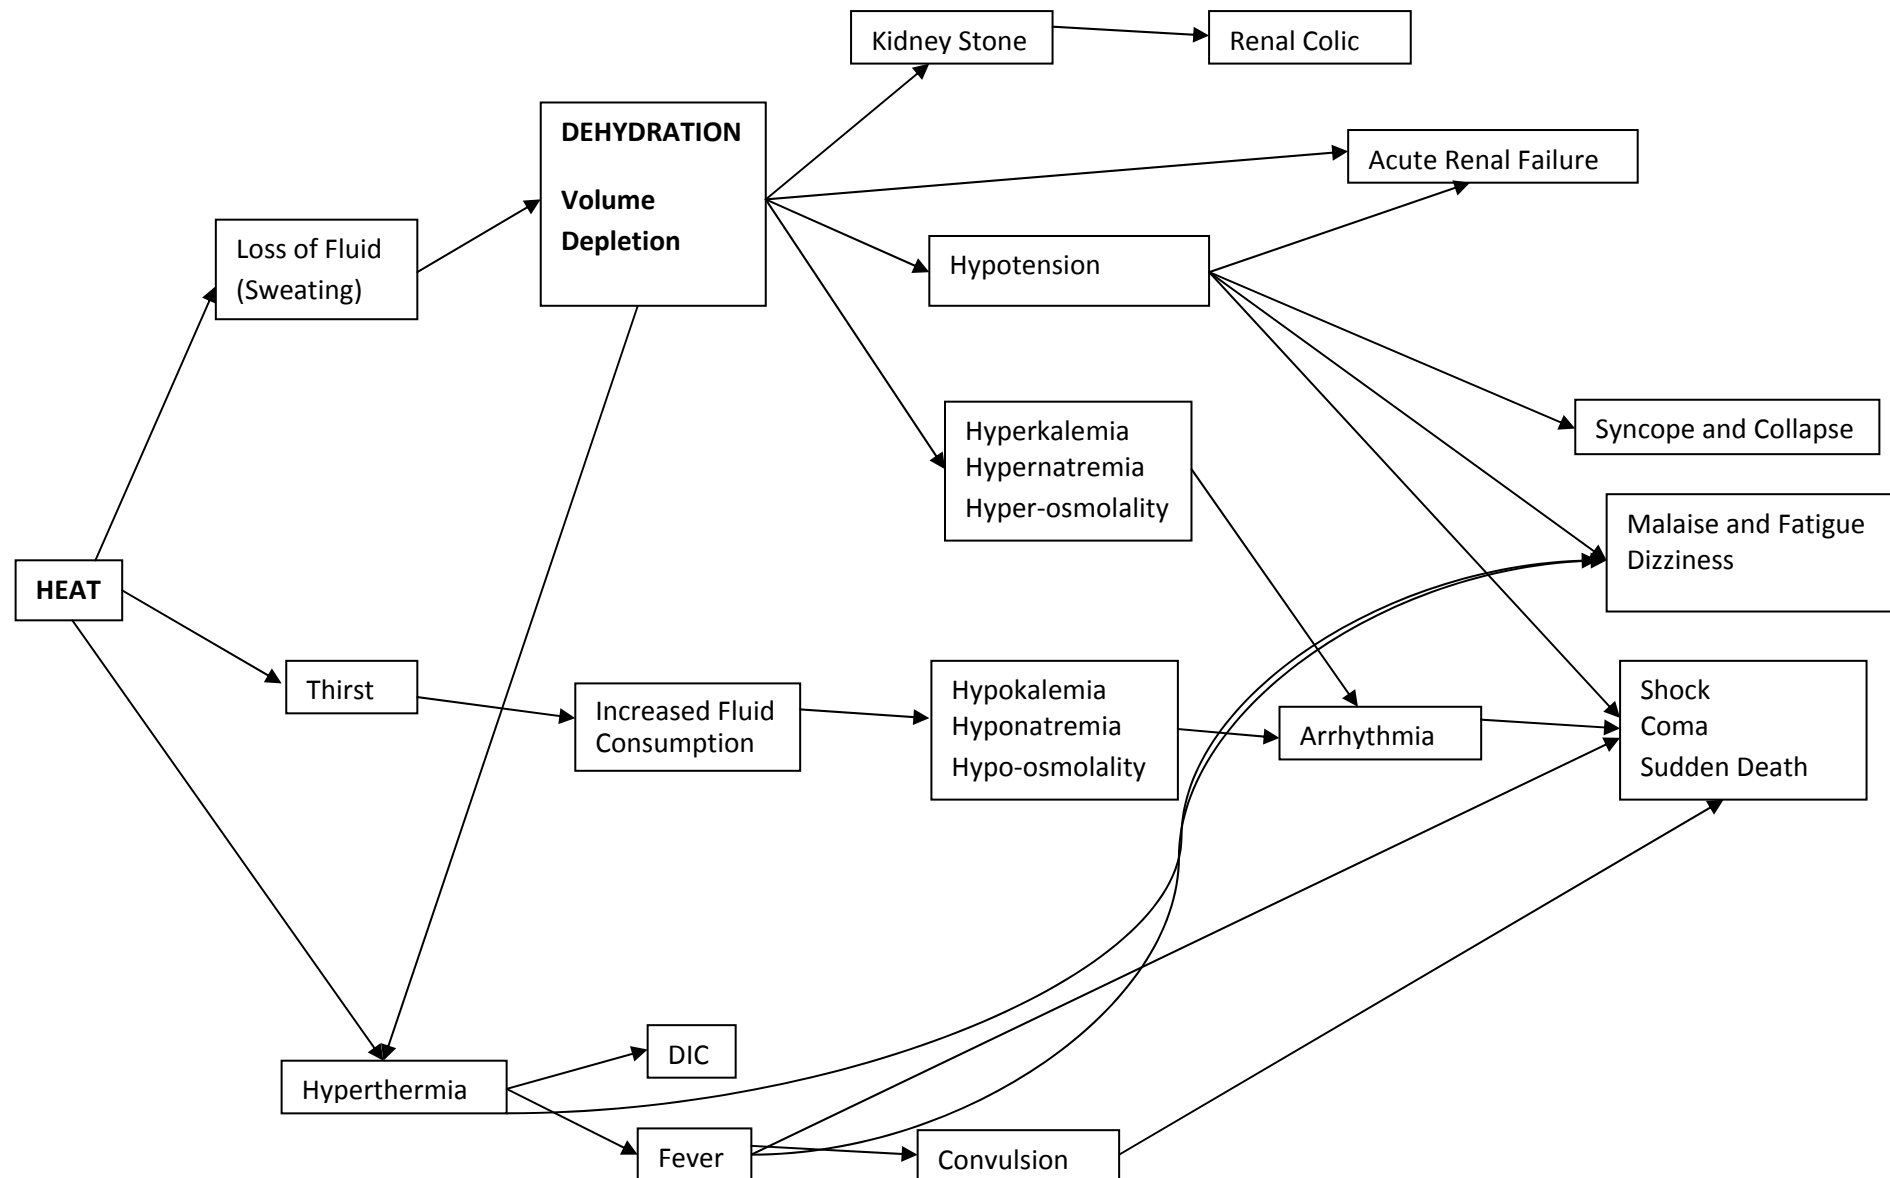

Supplement: Supplementary File 1 — Supplementary Information (PDF, 203 KB) [file ijerph-11-03304-s001.pdf]
